# Supplementary material for: Silver nanoparticle@DNA tetrahedron-based colorimetric detection of HIV-related DNA with cascade strand displacement amplification
Source: Royal Society of Chemistry journal article supplement (doi:10.1039/c9tb00274j), 2019-01-01
Supplement: c9tb00274j1.pdf [file c9tb00274j1.pdf]

## Supporting Information

### **Silver nanoparticle@DNA tetrahedron based colorimetric detection of HIV-related DNA with cascade strand displacement amplification**

Xiaoyi Ma,<sup>ab</sup> and Peng Miao<sup>\*ab</sup>

<sup>a</sup> University of Science and Technology of China, Hefei 230026, People's Republic of China

<sup>b</sup> Suzhou Institute of Biomedical Engineering and Technology, Chinese Academy of Sciences,  
Suzhou 215163, People's Republic of China

E-mail: miaopeng@sibet.ac.cn (P. Miao).

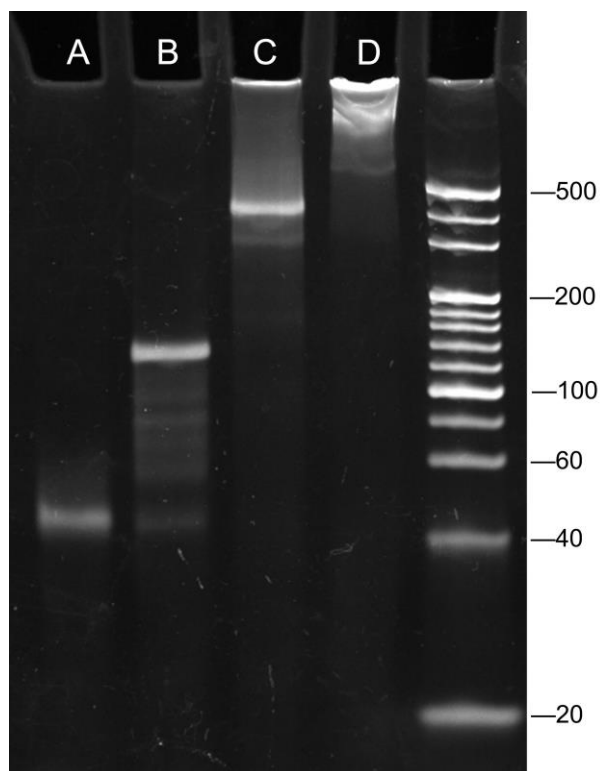

**Fig. S1** Polyacrylamide gel electrophoresis analysis of the formation of TDNA: (A) probe T-B, (b) probe T-B and T-C, (c) probe T-B, T-C and T-D, (d) probe T-A1, T-B, T-C and T-D.

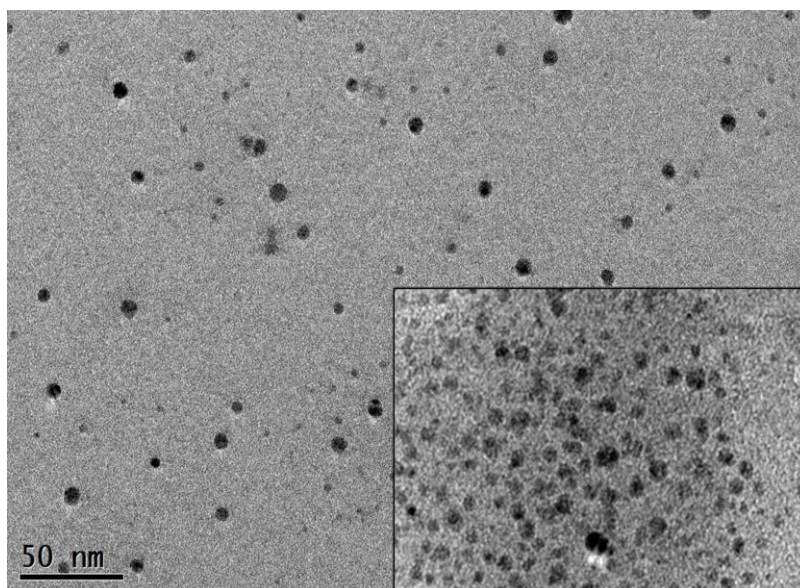

**Fig. S2** TEM image of AgNP@DNA tetrahedron. Inset shows Target DNA induced aggregation of AgNP@DNA tetrahedrons.

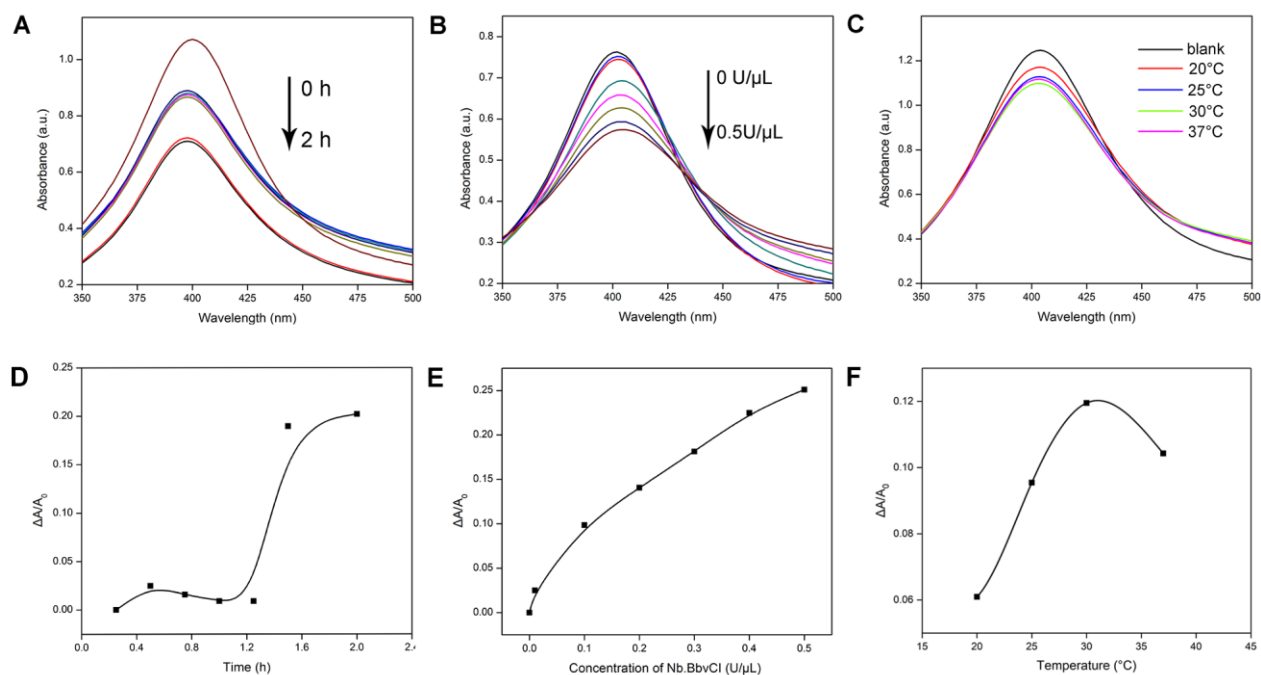

**Fig. S3** UV-vis absorption spectra of AgNP@DNA tetrahedron for DNA detection (A) with different reaction time; (B) with different concentrations of enzymes ( $c_{\text{Nb.BbvCI}} : c_{\text{Klenow fragment}} = 5 : 1$ ); (C) at different temperatures for extension and nicking reactions. (D-F) show corresponding  $\Delta A/A_0$  values with different experimental conditions.

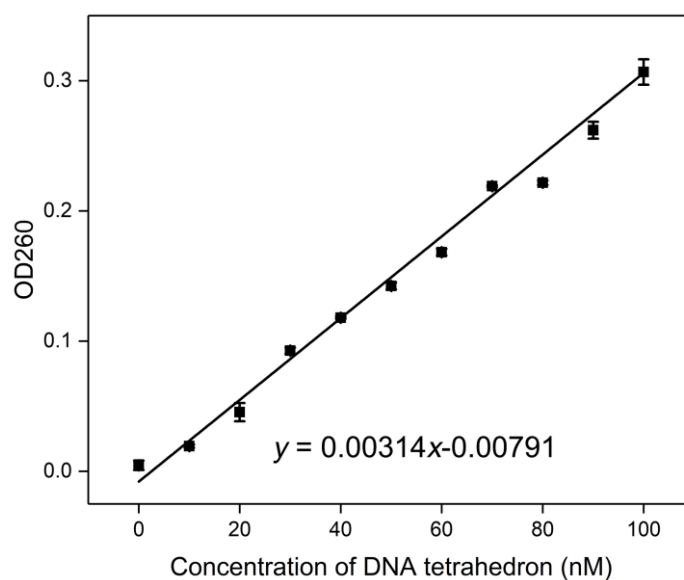

**Fig. S4** Calibration plot reflecting the linear relationship between concentration of DNA tetrahedron and UV-vis absorption (260 nm).

**Table S1** Comparison of analytical performances of the proposed method with previously developed colorimetric assays.

| Strategy                                                    | Detection range (M)                        | LOD (M)               | Ref         |
|-------------------------------------------------------------|--------------------------------------------|-----------------------|-------------|
| hybridization-mediated growth of AuNPs                      | 0 to $2 \times 10^{-7}$                    | $6 \times 10^{-8}$    | 1           |
| amine-terminated polydiacetylene vesicles                   | $10^{-8}$ to $10^{-3}$                     | $10^{-8}$             | 2           |
| toehold length and temperature adjustments                  | $5 \times 10^{-9}$ to $3 \times 10^{-8}$   | $5 \times 10^{-9}$    | 3           |
| AuNPs de-aggregation with Exo III-aided amplification       | $3 \times 10^{-9}$ to $1.5 \times 10^{-7}$ | $3 \times 10^{-9}$    | 4           |
| aggregation of exonuclease-sheared AuNPs                    | $5 \times 10^{-9}$ to $4 \times 10^{-8}$   | $2 \times 10^{-9}$    | 5           |
| pyrrolidinyl peptide nucleic acid-induced AgNPs aggregation | $2 \times 10^{-8}$ to $2.5 \times 10^{-6}$ | $1.03 \times 10^{-9}$ | 6           |
| retardation of avidin-induced AuNPs aggregation             | $10^{-9}$ to $2.5 \times 10^{-7}$          | $10^{-9}$             | 7           |
| Y-shaped DNA structure                                      | $10^{-9}$ to $2.5 \times 10^{-7}$          | $9.5 \times 10^{-10}$ | 8           |
| peroxidase mimetics of PtNPs on reduced graphene oxide      | $5 \times 10^{-10}$ to $10^{-8}$           | $4 \times 10^{-10}$   | 9           |
| catalyzed hairpin assembly and AuNPs                        | $5 \times 10^{-11}$ to $7 \times 10^{-10}$ | $2.5 \times 10^{-11}$ | 10          |
| AgNP@DNA tetrahedron and cascade SDA                        | $10^{-9}$ to $1.5 \times 10^{-5}$          | $8.4 \times 10^{-10}$ | this method |

**Table S2** DNA sequences used in this work

| Name         | Sequence (5'-3')                                                                                                |
|--------------|-----------------------------------------------------------------------------------------------------------------|
| Target DNA   | GCTAGAGATTTTCCACACTGACT                                                                                         |
| Template DNA | <b>GAATCCATGAAAAAAAAGGAAGCTGCCTCAGC</b> <u>AGTCAGTGTG</u><br><u>GAAAATCTCTAGCCCTCAGCAGTCAGTGTGGAAAATCTCTAGC</u> |
| Linker DNA   | <b>TGAGGCAGCTTCCTTTTTTTTCATGGATTC</b>                                                                           |
| T-A1         | <b>AGGAAGCTGCCTC</b> ATTACATTCTAAGTCTGAAACATTACAGCTT<br>GCTACACGAGAAGAGCCGCCATAGTA                              |
| T-A2         | <b>GAATCCATGAA</b> ATTACATTCTAAGTCTGAAACATTACAGCTTGC<br>TACACGAGAAGAGCCGCCATAGTA                                |
| T-B          | NH <sub>2</sub> -C <sub>6</sub> -TATCACCAGGCAGTTGACAGTGTAGCAAGCTGTAATAGA<br>TGCGAGGGTCCAATAC                    |
| T-C          | NH <sub>2</sub> -C <sub>6</sub> -TCAACTGCCTGGTGATAAACGACACTACGTGGGAATCT<br>ACTATGGCGGCTCTTC                     |
| T-D          | NH <sub>2</sub> -C <sub>6</sub> -TTCAGACTTAGGAATGTGCTTCCCACGTAGTGTGCGTTTGT<br>ATTGGACCCTCGCAT                   |
| M1           | GCTAGAGATTTTCCACACTGACT <u>T</u>                                                                                |
| M2           | G <u>T</u> TAGAGATTTTCCACACTGACT                                                                                |
| M3           | GCTAGAGATTTT <u>C</u> GACACTGACT                                                                                |
| M4           | GCTAGAGACTTTCCACACTGACT                                                                                         |

Bold sequences are the recognition sites of the enzyme. Green and blue sequences are complementary sequences. Underlined parts are the complementary sequences of target DNA.

## References

1. W. F. Fang, W. J. Chen and J. T. Yang, *Sens. Actuator B-Chem.*, 2014, **192**, 77-82.
2. P. Zhang, C. S. Zhang and B. W. Shu, *Sens. Actuator B-Chem.*, 2016, **236**, 27-34.
3. M. K. Lam, T. Gadzikwa, T. Nguyen, A. Kausar, B. S. Alladin-Mustan, M. D. Sikder and J. M. Gibbs-Davis, *Langmuir*, 2016, **32**, 1585-1590.
4. Q. L. Liu, L. Li, Y. Zhao and Z. B. Chen, *Microchim. Acta*, 2018, **185**, 301.
5. S. Wu, P. P. Liang, H. X. Yu, X. W. Xu, Y. Liu, X. H. Lou and Y. Xiao, *Anal. Chem.*, 2014, **86**, 3461-3467.
6. P. Teengam, W. Siangproh, A. Tuantranont, T. Vilaivan, O. Chailapakul and C. S. Henry, *Anal. Chem.*, 2017, **89**, 5428-5435.
7. J. Y. Piao, X. Zhou and X. Wu, *Microchim. Acta*, 2018, **185**, 537.
8. H. Zhang, X. T. Li, F. He, M. Q. Zhao and L. S. Ling, *Sci Rep*, 2018, **8**, 12021.
9. L. Y. Chau, Q. J. He, A. L. Qin, S. P. Yip and T. M. H. Lee, *J. Mater. Chem. B*, 2016, **4**, 4076-4083.
10. J. Y. Dai, H. F. He, Z. J. Duan, C. S. Zhou, Y. Y. Long, B. Z. Zheng, J. Du, Y. Guo and D. Xiao, *J. Mater. Chem. B*, 2016, **4**, 3191-3194.
